# Supplementary material for: Carbohydrates digestion and metabolism in the spiny lobster (Panulirus argus): biochemical indication for limited carbohydrate utilization
Source: PeerJ. 2017 Nov 3;5:e3975. doi: 10.7717/peerj.3975 (PMC5672836; doi:10.7717/peerj.3975)
Supplement: Supplemental Information 1 [file peerj-05-3975-s001.xls]

## Sheet: STD Glc
	Standard (STD) glucose
									glucosa	180,06 g/mol
	Raw Data				Abs media	(mM)
	2.008	2.037	2.059	2.063	2.04175	2	2.44
	1.15	1.121	1.128	1.087	1.1215	1	1.22
	0.669	0.662	0.662	0.661	0.6635	0.5	0.61
	0.416	0.422	0.425	0.429	0.423	0.25	0.305
	0.29	0.288	0.287	0.291	0.289	0.125	0.1525
	0.23	0.224	0.226	0.231	0.22775	0.0625	0.07625
	0.197	0.195	0.194	0.192	0.1945	0.03125	0.038125
	0.161	0.156	0.154	0.165	0.159	0	0
	0.104	0.098	0.099	0.099	0.1	Blank

## Sheet: Glycogen Digestive gland
Glycogen in digestive gland (DG)
Raw Data
						DEPENDE DEL PESO
					Dilution 1/15 to homogenization:			1	MQw
					Dilution 1/22 for glc/gly:			22	MQw
				Conc. = (Abs - b) / a
					a =	0.769
					b =	0.174
		with	with	without	without	with	without
		AGS	AGS	AGS	AGS	AGS	AGS	[Gly+Glc]	[Glucose]	Gly	[Glycogen]				[Glucose]
Group	Nº	Abs 1	Abs 2	Abs 1	Abs 2	Abs Mean	Abs Mean	(mmol glc)	(mmol glc)	mM	(mg glc/g ps)	Mean	SD	SEM	(mg glc/g ps)	Mean	SD	SEM
0.06	1	0.207	0.202	0.2		0.2045	0.2	0.872562	0.743823	0.128739	0.347903				2.01011
0.06	2	0.186	0.179	0.184	0.18	0.1825	0.182	0.243173	0.228869	0.0143043	0.0386559				0.618495
0.06	3	0.215	0.209	0.21	0.208	0.212	0.209	1.08713	1.0013	0.0858257	0.231936	0.289919	0.316648	0.129271	2.70591	2.1905	1.69446	0.691762
0.06	4	0.201	0.198		0.199	0.1995	0.199	0.729519	0.715215	0.0143043	0.0386559				1.9328
0.06	5	0.199	0.189	0.189	0.176	0.194	0.1825	0.572172	0.243173	0.328999	0.889086				0.657151
0.06	6	0.244		0.243	0.24	0.244	0.2415	2.0026	1.93108	0.0715215	0.19328				5.21855
0.2	7	0.351	0.36	0.345	0.353	0.3555	0.349	5.19246	5.0065	0.185956	0.502527
0.2	8	0.235	0.225	0.222	0.221	0.23	0.2215	1.60208	1.35891	0.243173	0.657151				3.67231
0.2	9	0.192	0.172	0.174	0.175	0.182	0.1745	0.228869	0.0143043	0.214564	0.579839
0.2	10	0.223	0.218	0.218	0.222	0.2205	0.22	1.3303	1.31599	0.0143043		0.473535	0.221781	0.0991834	3.55634	3.90425	0.960971	0.480485
0.2	11	0.238	0.234	0.241	0.244	0.236	0.2425	1.77373	1.95969	-0.185956					5.29586
0.2	12	0.212	0.22	0.214		0.216	0.214	1.20156	1.14434	0.0572172	0.154624				3.09247
0.35	13	0.276	0.275	0.252	0.258	0.2755	0.255	2.90377	2.3173	0.586476	1.58489				6.26226
0.35	14	0.172		0.169	0.167	0.172	0.168	-0.0572172	-0.171651	0.114434	0.309247
0.35	15	0.243	0.243	0.237		0.243	0.237	1.97399	1.80234	0.171651	0.463871	0.726731	0.50059	0.223871	4.87065	6.50193	1.41831	0.634287
0.35	16	0.294	0.298		0.287	0.296	0.287	3.49025	3.23277	0.257477	0.695807				8.73624
0.35	17	0.284	0.297	0.246	0.275	0.2905	0.2605	3.3329	2.47464	0.858257					6.68747
0.35	18	0.26	0.257		0.251	0.2585	0.251	2.41743	2.20286	0.214564	0.579839				5.95301
fish	19	0.324	0.317	0.218	0.217	0.3205	0.2175	4.19116	1.24447	2.94668					3.36306
fish	20	0.188	0.187	0.183	0.181	0.1875	0.182	0.386216	0.228869	0.157347	0.425215
fish	21	0.275	0.213	0.205	0.207	0.244	0.206	2.0026	0.915475	1.08713		0.280255	0.185051	0.0827574	2.47398	3.51125	1.35801	0.60732
fish	22	0.21	0.21	0.206	0.203	0.21	0.2045	1.02991	0.872562	0.157347	0.425215				2.35801
fish	23	0.205	0.208	0.206		0.2065	0.206	0.929779	0.915475	0.0143043	0.0386559				2.47398
fish	24	0.242	0.244	0.24		0.243	0.24	1.97399	1.88817	0.0858257	0.231936				5.10258
fish	25	0.263	0.259	0.244	0.241	0.261	0.2425	2.48895	1.95969	0.529259	1.43027				5.29586
														0				0

## Sheet: Glycogen muscle
Glycogen muscle
Raw Data
					Dilution to homogenization 1/15 :			1	MQw
					Dilution 1/22 for glc/gly:			22	MQw
				Conc. = (Abs - b) / a
					a =	0.769
					b =	0.174
		with	with	without	without	with	without
		AGS	AGS	AGS	AGS	AGS	AGS	[Gly+Glc]	[Glucose]	Gly	[Glycogen]				[Glucose]
Group	Nº	Abs 1	Abs 2	Abs 1	Abs 2	Abs Media	Abs Media	(mmol glc)	(mmol glc)	mM	(mg glc/g ps)	Mean	SD	SEM	(mg glc/g ps)	Mean	SD	SEM
0.06	1	0.504	0.478	0.481	0.486	0.491	0.4835	9.06892	8.85436	0.214564	0.579839				23.928
0.06	2	0.345	0.347	0.266	0.269	0.346	0.2675	4.92068	2.6749	2.24577					7.22866
0.06	3	0.231	0.231	0.223	0.227	0.231	0.225	1.63069	1.45904	0.171651	0.463871	0.605609	0.156226	0.0901971	3.9429	18.6708	10.3704	4.23368
0.06	4	0.463	0.445	0.511	0.46	0.454	0.4855	8.0104	8.91157	-0.90117					24.0826
0.06	5	0.565	0.552	0.57	0.527	0.5585	0.5485	11	10.7139	0.286086	0.773118				28.9533
0.06	6	0.332	0.33	0.487	0.479	0.331	0.483	4.49155	8.84005	-4.3485					23.8894
0.2	7	0.347	0.348	0.334	0.32	0.3475	0.327	4.96359	4.37711	0.586476	1.58489				11.8287
0.2	8	0.427	0.425	0.406	0.438	0.426	0.422	7.20936	7.09493	0.114434	0.309247				19.1733
0.2	9	0.167	0.162	0.162	0.16	0.1645	0.161	-0.271782	-0.371912	0.10013	0.270591
0.2	10	0.261	0.257	0.242	0.232	0.259	0.237	2.43173	1.80234	0.629389	1.70086	0.85043	0.725764	0.324572	4.87065	12.0297	5.13341	2.29573
0.2	11	0.342	0.367	0.342	0.352	0.3545	0.347	5.16385	4.94928	0.214564					13.3749
0.2	12	0.321	0.319	0.318	0.312	0.32	0.315	4.17685	4.03381	0.143043	0.386559				10.901
0.35	13	0.711	0.67	0.632	0.59	0.6905	0.611	14.7763	12.502	2.27438	6.14629				33.7853
0.35	14	0.336	0.335	0.305	0.299	0.3355	0.302	4.62029	3.6619	0.958388	2.58995
0.35	15	0.351		0.305	0.303	0.351	0.304	5.06372	3.71912	1.3446	3.63366	3.18911	1.82803	1.05542	10.0505	6.92907	2.71389	1.35694
0.35	16	0.284			0.279	0.284	0.279	3.14694	3.0039	0.143043	0.386559				8.11774
0.35	17	0.264	0.26	0.25	0.245	0.262	0.2475	2.51756	2.10273	0.414824					5.68242
0.35	18	0.219	0.218	0.224	0.224	0.2185	0.224	1.27308	1.43043	-0.157347	-0.425215				3.86559
fish	19	0.632			0.615	0.632	0.615	13.1027	12.6164	0.486346	1.3143				34.0945
fish	20	0.419	0.391	0.411	0.371	0.405	0.391	6.60858	6.20806	0.40052	1.08237				16.7767
fish	21	0.291	0.288	0.283	0.285	0.2895	0.284	3.30429	3.14694	0.157347	0.425215	1.21766	0.439217	0.17931	8.5043	18.484	11.8672	4.84476
fish	22	0.322	0.319	0.3	0.301	0.3205	0.3005	4.19116	3.61899	0.572172	1.54624				9.77995
fish	23	0.631	0.601	0.595	0.594	0.616	0.5945	12.645	12.0299	0.615085	1.6622				32.5096
fish	24	0.306	0.314	0.305	0.282	0.31	0.2935	3.89077	3.41873	0.472042	1.27565				9.23876

## Sheet: Lactate Digestive Gland
Lactate digestive gland
Raw Data
														Raw Data				Abs media	(mg/dL)
														0.002	0.002	0.002	0.001	0.00175	0	0.00175
														0.07	0.07	0.071	0.071	0.0705	2.5	0.0705
Group	Nº	DO1	DO2	mean	mg/dL	V (mL) buffer	weight (g)	mg/VOL final	mg/g	Mean	SD	SEM		0.129	0.13	0.135	0.127	0.13025	5	0.13025
0.06	1	0.092	0.103	0.0975	3.60155	1.605	0.107	0.0578049	0.540233					0.273	0.275	0.27	0.263	0.27025	10	0.27025
0.06	2	0.046	0.056	0.051	1.86338	1.5	0.1	0.0279507	0.279507
0.06	3	0.203	0.219	0.211	7.84418	1.53	0.102	0.120016	1.17663	0.631814	0.354142	0.144578
0.06	4	0.08	0.075	0.0775	2.85395	1.665	0.111	0.0475183	0.428093
0.06	5	0.172	0.172	0.172	6.38636	1.545	0.103	0.0986693	0.957954
0.06	6	0.074	0.074	0.074	2.72312	1.5	0.1	0.0408468	0.408468
0.2	7	0.056	0.062	0.059	2.16242	1.65	0.11	0.0356799	0.324363
0.2	8	0.016	0.016	0.016	0.55508	2.25	0.15	0.0124893	0.083262
0.2	9	0.013	0.014	0.0135	0.46163	1.83	0.122	0.00844783	0.0692445	0.229044	0.121466	0.0495884
0.2	10	0.047	0.046	0.0465	1.69517	1.5	0.1	0.0254276	0.254276
0.2	11	0.056	0.058	0.057	2.08766	2.76	0.184	0.0576194	0.313149
0.2	12	0.061	0.059	0.06	2.1998	2.565	0.171	0.0564249	0.32997
0.35	13	0.133	0.145	0.139	5.15282	1.665	0.111	0.0857945	0.772923
0.35	14	0.018	0.018	0.018	0.62984	1.575	0.105	0.00991998	0.094476
0.35	15	0.101	0.098	0.0995	3.67631	1.845	0.123	0.0678279	0.551447	0.63415	0.428958	0.175122
0.35	16	0.065	0.065	0.065	2.3867	1.785	0.119	0.0426026	0.358005
0.35	17	0.254	0.233	0.2435	9.05903	1.56	0.104	0.141321	1.35885
0.35	18	0.119	0.122	0.1205	4.46129	1.5	0.1	0.0669194	0.669193
fish	19	0.029	0.029	0.029	1.04102	1.92	0.128	0.0199876	0.156153
fish	20	0.097	0.097	0.097	3.58286	1.695	0.113	0.0607295	0.537429
fish	21	0.155	0.171	0.163	6.04994	1.68	0.112	0.101639	0.907491	0.538363	0.305397	0.124678
fish	22	0.119	0.126	0.1225	4.53605	1.92	0.128	0.0870922	0.680408
fish	23	0.036	0.036	0.036	1.30268	2.385	0.159	0.0310689	0.195402
fish	24	0.138	0.133	0.1355	5.02199	2.04	0.136	0.102449	0.753299
fish	25	0.179	0.177	0.178	6.61064	1.875	0.125	0.123949	0.991596

## Sheet: Lactate muscle
Lactate muscle
Raw Data
dil 1/4
Grupo	Nº	DO1	DO2	Mean	mg/dL	xdil	V (mL) buffer	weight (g)	mg/VOL final	mg/g	Mean	SD	SEM		Raw Data				Abs media	(mg/dL)
0.06	1	0.293	0.284	0.2885	10.7411	42.9645	2.16	0.144	0.928034	6.44468					0.002	0.002	0.002	0.001	0.00175	0
0.06	2	0.252	0.231	0.2415	8.98427	35.9371	2.235	0.149	0.803194	5.39056					0.07	0.07	0.071	0.071	0.0705	2.5
0.06	3	0.051	0.048	0.0495	1.80731	7.22924	2.175	0.145	0.157236	1.08439	5.0448	2.20771	0.901294		0.129	0.13	0.135	0.127	0.13025	5
0.06	4	0.349	0.331	0.34	12.6662	50.6648	1.845	0.123	0.934766	7.59972					0.273	0.275	0.27	0.263	0.27025	10
0.06	5	0.247	0.199	0.223	8.29274	33.171	1.5	0.1	0.497564	4.97564
0.06	6	0.205	0.223	0.214	7.95632	31.8253	2.34	0.156	0.744712	4.77379
0.2	7	0.095	0.104	0.0995	3.67631	14.7052	1.62	0.108	0.238225	2.20579
0.2	8	0.108	0.111	0.1095	4.05011	16.2004	1.89	0.126	0.306188	2.43007
0.2	9	0.139	0.136	0.1375	5.09675	20.387	1.545	0.103	0.314979	3.05805	2.9403	0.927114	0.378493
0.2	10	0.14	0.135	0.1375	5.09675	20.387	1.74	0.116	0.354734	3.05805
0.2	11	0.105	0.096	0.1005	3.71369	14.8548	1.545	0.103	0.229506	2.22821
0.2	12	0.232	0.186	0.209	7.76942	31.0777	1.575	0.105	0.489473	4.66165
0.35	13	0.161	0.156	0.1585	5.88173	23.5269	1.89	0.126	0.444659	3.52904
0.35	14	0.064	0.071	0.0675	2.48015	9.9206	1.275	0.085	0.126488	1.48809
0.35	15	0.067	0.068	0.0675	2.48015	9.9206	2.25	0.15	0.223214	1.48809	3.1814	1.75361	0.715907
0.35	16	0.3	0.261	0.2805	10.4421	41.7684	2.4	0.16	1.00244	6.26525
0.35	17	0.148	0.13	0.139	5.15282	20.6113	1.71	0.114	0.352453	3.09169
0.35	18	0.148	0.142	0.145	5.3771	21.5084	2.415	0.161	0.519428	3.22626
fish	19	0.143	0.13	0.1365	5.05937	20.2375	2.655	0.177	0.537305	3.03562
fish	20	0.153	0.15	0.1515	5.62007	22.4803	1.635	0.109	0.367553	3.37204
fish	21	0.248	0.249	0.2485	9.24593	36.9837	1.71	0.114	0.632422	5.54756	5.1831	2.17114	0.886364
fish	22	0.253	0.209	0.231	8.59178	34.3671	1.56	0.104	0.536127	5.15507
fish	23	0.426	0.389	0.4075	15.1894	60.7574	2.445	0.163	1.48552	9.11361
fish	24	0.21	0.227	0.2185	8.12453	32.4981	3.015	0.201	0.979818	4.87472

## Sheet: Lactato hemolymph
Lactate Hemolymph
Raw Data
										Raw Data				Abs media	(mg/dL)
Grupo	Nº	DO1	DO2	Mean	mg/dL	Mean	SD	SEM		0.002	0.002	0.002	0.002	0.002	0
0.06	1	0.078	0.074	0.076	3.05612					0.069	0.066	0.049	0.063	0.06175	2.5
0.06	2	0.089	0.083	0.086	3.46982	3.73459	2.53408	1.13327		0.124	0.122	0.125	0.127	0.1245	5
0.06	3	0.027	0.022	0.0245	0.925565					0.24	0.244	0.249	0.24	0.24325	10
0.06	4	0.187	0.194	0.1905	7.79298
0.06	5	0.063	0.068	0.0655	2.62173
0.06	6	0.104	0.087	0.0955	3.86283
0.2	7	0.085	0.087	0.086	3.46982
0.2	8	0.112	0.128	0.12	4.8764	3.57669	1.34101	0.547467
0.2	9	0.05	0.053	0.0515	2.04256
0.2	10	0.091	0.05	0.0705	2.82858
0.2	11	0.073	0.064	0.0685	2.74585
0.2	12	0.115	0.155	0.135	5.49695
0.35	13	0.107	0.08	0.0935	3.78009
0.35	14	0.014	0.013	0.0135		3.95247	0.952828	0.38899
0.35	15	0.116	0.147	0.1315	5.35215
0.35	15a	0.059	0.102	0.0805	3.24228
0.35	16	0.099	0.105	0.102	4.13174
0.35	17	0.1	0.124	0.112	4.54544
0.35	18	0.059	0.074	0.0665	2.6631
fish	19	0.111	0.104	0.1075	4.35928
fish	20	0.09	0.114	0.102	4.13174	4.09726	1.30395	0.532337
fish	21	0.066	0.056	0.061	2.43557
fish	22	0.072	0.085	0.0785	3.15955
fish	23	0.099	0.109	0.104	4.21448
fish	24	0.131	0.177	0.154	6.28298

## Sheet: Protein hemolymph
Protein (soluble) in hemolymph
Raw Data
Nº	DO1	DO2	Mean	mg/mL							STD 2mg/ML
1	0.324	0.365	0.3445	0.047249		Raw Data				Abs media	(mg/mL)	Abs media
2	0.382	0.367	0.3745	0.049709		-0.038	-0.038	-0.039	-0.038	-0.03825	0	0	0
3	0.35	0.361	0.3555	0.048151		0.067	0.071	0.046	0.046	0.0575	0.5	0.0575
4	0.366	0.373	0.3695	0.049299		0.13	0.115	0.15		0.131667	1	0.131667
5	0.179	0.159	0.169	0.032858			0.271	0.256	0.268	0.265	2		0.265
6	0.31	0.264	0.287	0.042534		0.35	0.333	0.346		0.343	4	0.343
7	0.444	0.422	0.433	0.054506
8	0.382	0.344	0.363	0.048766
9	0.263	0.252	0.2575	0.040115
10	0.458	0.423	0.4405	0.055121
11	0.355	0.368	0.3615	0.048643
12	0.31	0.238	0.274	0.041468
13	0.271	0.314	0.2925	0.042985
14	0.331	0.231	0.281	0.042042
15	0.448	0.502	0.475	0.05795
16	0.332	0.376	0.354	0.048028
17	0.263	0.252	0.2575	0.040115
18	0.458	0.423	0.4405	0.055121
19	0.355	0.368	0.3615	0.048643
20	0.31	0.238	0.274	0.041468
21	0.271	0.314	0.2925	0.042985
22	0.331	0.231	0.281	0.042042
23	0.448	0.502	0.475	0.05795
24	0.332	0.376	0.354	0.048028

## Sheet: Glucose hemplymph
Glucose hemolymph
Raw Data
Grupo	Nº	DO1	DO2	Mean	mg/dL	mg/L	mmol/ L	Mean	SD	SEM
0.06	1	0.147	0.148	0.1475	21.3273	2.13273	1.18367					DO1	DO2	DO3	DO4	Abs mean	(mg/dL)	Abs mean
0.06	2	0.133	0.134	0.1335	19.0109	1.90109	1.05511					0.119	0.116	0.114	0.119	0.117	0	0.117
0.06	3	0.116	0.112	0.114	15.7844	1.57844	0.876036	1.24871	0.306381	0.125079		0.674		0.639	0.58	0.631	50	0.631
0.06	4	0.206	0.206	0.206	31.0068	3.10068	1.72088					0.986	1.069			1.0275	100	1.0275
0.06	5	0.177	0.185	0.181	26.8703	2.68703	1.4913					1.347	1.327			1.337	150	1.337
0.06	6	0.147	0.144	0.1455	20.9964	2.09964	1.1653					1.491	1.485	1.494	1.466	1.484	200	1.484
0.2	7	0.125	0.122	0.1235	17.3563	1.73563	0.963275
0.2	8	0.152	0.152	0.152	22.0719	2.20719	1.22499
0.2	9	0.116	0.117	0.1165	16.1981	1.61981	0.898994	1.06123	0.127332	0.0519831
0.2	10	0.133	0.143	0.138	19.7555	1.97555	1.09643
0.2	11	0.147	0.147	0.147	21.2446	2.12446	1.17908
0.2	12	0.13	0.126	0.128	18.1009	1.81009	1.0046
0.35	13	0.163	0.176	0.1695	24.9675	2.49675	1.38569
0.35	14	0.12	0.121	0.1205	16.8599	1.68599	0.935726
0.35	15a	0.146	0.135	0.1405	20.1691	2.01691	1.11939
	15	0.199	0.214	0.2065	31.0895	3.10895	1.72547	1.14628	0.305677	0.115535
0.35	16	0.133	0.128	0.1305	18.5145	1.85145	1.02756
0.35	17	0.122	0.121	0.1215	17.0254	1.70254	0.944909
0.35	18	0.116	0.114	0.115	15.9499	1.59499	0.885219
fish	19	0.254	0.231	0.2425	37.046	3.7046	2.05606
fish	20	0.212	0.258	0.235	35.8051	3.58051	1.98718
fish	21	0.125	0.123	0.124	17.439	1.7439	0.967867
fish	22	0.167	0.174	0.1705	25.1329	2.51329	1.39488	1.21581	0.22168	0.127987
fish	23	0.292	0.257	0.2745	42.3408	4.23408
fish	24	0.149	0.168	0.1585	23.1474	2.31474	1.28468

## Sheet: Triglyceride DG and muscle
Tryglyceride Digestive gland and muscle
dil for DG 1/3
Digestive Gland
Group	Nº	DO1	DO2	Mean	Conc (mg/dL)	x dil (x 3)	mL H2O	weight tissue (g)	mg/VOL FINAL DG	mg/g	Mean	DE	SEM	DO1	DO2	DO3	DO4	Abs mean	(mg/dL)	Abs mean
0.06	1	0.462	0.448	0.455	125.651	376.954	1.605	0.107	6.05012	56.5432				0.043	0.042	0.043	0.044	0.043	0	0.043
0.06	2	0.639	0.566	0.6025	172.158	516.475	1.5	0.1	7.74712	77.4712					0.159	0.151	0.15	0.153333	25	0.153333
0.06	3	0.311	0.311	0.311	80.2483	240.745	1.53	0.102	3.6834	36.1117	55.2662	24.1549	9.86121	0.221	0.195	0.223	0.2	0.20975	50	0.20975
0.06	4	0.399	0.383	0.391	105.472	316.417	1.665	0.111	5.26834	47.4625				0.386		0.376	0.377	0.379667	100	0.379667
0.06	5	0.672	0.689	0.6805	196.752	590.255	1.545	0.103	9.11944	88.5382				0.691	0.678	0.689		0.686	200	0.686
0.06	6	0.251	0.221	0.236	56.6008	169.802	1.5	0.1	2.54704	25.4704
0.2	7	0.808	0.841	0.8245	242.155	726.465	1.65	0.11	11.9867	108.97
0.2	8	0.328	0.304	0.316	81.8248	245.474	2.25	0.15	5.52317	36.8212
0.2	9	0.07	0.071	0.0705	4.41865	13.256	1.83	0.122	0.242584		60.9416	34.5849	15.4668
0.2	10	0.249	0.246	0.2475	60.2267	180.68	1.5	0.1	2.7102	27.102
0.2	11	0.409	0.369	0.389	104.842	314.525	2.76	0.184	8.68089	47.1788
0.2	12	0.689	0.617	0.653	188.081	564.243	2.565	0.171	14.4728	84.6364
0.35	13	0.365	0.365	0.365	97.2745	291.824	1.665	0.111	4.85886	43.7735
0.35	14	0.138	0.139	0.1385	25.8591	77.5772	1.575	0.105	1.22184	11.6366
0.35	15	0.408	0.378	0.393	106.103	318.309	1.845	0.123	5.8728	47.7463	36.5847	23.6668	9.66194
0.35	16	0.251	0.248	0.2495	60.8573	182.572	1.785	0.119	3.25891	27.3858
0.35	17	0.574	0.588	0.581	165.379	496.138	1.56	0.104	7.73975	74.4207
0.35	18	0.204	0.114	0.159	32.3227	96.9681	1.5	0.1	1.45452	14.5452
fish	19	0.351	0.56	0.4555	125.809	377.427	1.92	0.128	7.24661	56.6141
fish	20	0.635	0.566	0.6005	171.528	514.583	1.695	0.113	8.72218	77.1874
fish	21	0.322	0.305	0.3135	81.0366	243.11	1.68	0.112	4.08424	36.4664
fish	22	0.738	0.803	0.7705	225.129	675.386	1.92	0.128	12.9674	101.308	73.6994	23.3497	9.53249
fish	23	0.659	0.637	0.648	186.504	559.513	2.385	0.159	13.3444	83.927
fish	24	0.685	0.65	0.6675	192.653	577.958	2.04	0.136	11.7903	86.6937
Muscle
Group	Nº	DO1	DO2	DO3	DO4	Mean	Conc (mg/dL)	mL H2O	weight tissue (g)	mg/VOL FINAL M	mg/g	Mean	DE	SEM
0.06	1		0.248	0.409	0.184	0.3285	85.7661	2.16	0.144	1.85255	12.8649
0.06	2	0.157	0.221	0.142	0.227	0.189	41.7817	2.235	0.149	0.933821	6.26725
0.06	3	0.268	0.251	0.211	0.236	0.2415	58.3349	2.175	0.145	1.26879	8.75024	10.1428	3.18812	1.30155
0.06	4	0.325	0.356			0.3405	89.5497	1.845	0.123	1.65219	13.4324
0.06	5	0.119	0.29	0.105	0.118	0.2045	46.6688	1.5	0.1	0.700033	7.00033
0.06	6	0.372	0.329	0.209	0.264	0.321667	83.6115	2.34	0.156	1.95651	12.5417
0.2	7	0.06	0.066	0.18	0.158	0.116	18.7648	1.62	0.108	0.30399	2.81472
0.2	8	0.077	0.203		0.167	0.149	29.1697	1.89	0.126	0.551307	4.37546
0.2	9	0.074	0.083	0.263	0.175	0.14875	29.0909	1.545	0.103	0.449454	4.36363	4.24934	1.49828	0.611671
0.2	10	0.069	0.07	0.243	0.239	0.15525	31.1403	1.74	0.116	0.541842	4.67105
0.2	11	0.064	0.069	0.129	0.18	0.1105	17.0307	1.545	0.103	0.263124	2.5546
0.2	12	0.041	0.125	0.188	0.44	0.1985	44.7771	1.575	0.105	0.705239	6.71656
0.35	13	0.133	0.11	0.279		0.174	37.0522	1.89	0.126	0.700287	5.55783
0.35	14	0.07	0.08	0.229	0.349	0.182	39.5746	1.275	0.085	0.504576	5.93619
0.35	15	0.119	0.066	0.254	0.234	0.16825	35.2392	2.25	0.15	0.792883	5.28588	4.87796	1.02486	0.418398
0.35	16	0.08	0.089	0.358	0.144	0.16775	35.0816	2.4	0.16	0.841958	5.26224
0.35	17	0.063	0.06	0.206	0.226	0.13875	25.9379	1.71	0.114	0.443538	3.89068
0.35	18	0.083	0.092	0.145	0.188	0.127	22.2331	2.415	0.161	0.536929	3.33497
fish	19	0.116	0.082		0.147	0.115	18.4495	2.655	0.177	0.489834	2.76742
fish	20	0.072	0.072	0.167	0.145	0.114	18.1342	1.635	0.109	0.296494	2.72013
fish	21	0.063	0.108	0.178	0.163	0.128	22.5484	1.71	0.114	0.385578	3.38226	3.1379	0.761533	0.310894
fish	22	0.073	0.066	0.136	0.185	0.115	18.4495	1.56	0.104	0.287812	2.76743
fish	23	0.095	0.181	0.13	0.04	0.1115	17.346	2.445	0.163	0.424108	2.60189
fish	24			0.095	0.212	0.1535	30.5886	3.015	0.201	0.922245	4.58828

## Sheet: Triglyceride  hemolymph
Triglyceride hemolymph
Raw data
Group	Nº	DO1	DO2	Mean	mg/dL	Mean	SD	SEM
0.06	1	0.069	0.071	0.07	9.0893						DO1	DO2	DO3	DO4	Abs mean	(mg/dL)	Abs mean
0.06	2	0.077	0.071	0.074	10.2233						0.041	0.048	0.049	0.041	0.04475	0	0.04475
0.06	3	0.054	0.05	0.052	3.98648	10.4831	6.21381	2.53678			0.135	0.133	0.133	0.134	0.13375	25	0.13375
0.06	4	0.103	0.107	0.105	19.0115						0.227	0.224	0.22	0.22	0.22275	50	0.22275
0.06	5	0.092	0.1	0.096	16.46						0.349	0.354	0.345	0.374	0.3555	100	0.3555
0.06	6	0.051	0.054	0.0525	4.12823						0.762	0.74	0.762	0.759	0.75575	200	0.75575
0.2	7	0.063	0.059	0.061	6.53789
0.2	8	0.055	0.058	0.0565	5.26219
0.2	9	0.051	0.05	0.0505	3.56125	5.73467	2.07678	0.847841
0.2	10	0.068	0.07	0.069	8.80581
0.2	11	0.052	0.048	0.05	3.4195
0.2	12	0.061	0.063	0.062	6.82138
0.35	13	0.098	0.056	0.077	11.0737
0.35	14	0.061	0.053	0.057	5.40393
0.35	15	0.062	0.058	0.06	6.2544	6.46702	2.36124	0.96397
0.35	16	0.06	0.058	0.059	5.97091
0.35	17	0.056	0.05	0.053	4.26997
0.35	18	0.058	0.059	0.0585	5.82917
fish	19	0.059	0.061	0.06	6.2544
fish	20	0.064	0.062	0.063	7.10487
fish	21	0.058	0.061	0.0595	6.11265	6.20715	1.36154	0.555846
fish	22	0.063	0.058	0.0605	6.39614
fish	23	0.065	0.065	0.065	7.67185
fish	24	0.052	0.05	0.051	3.70299

[truncated: 2 more sheets: amino acid hemolymph, amino aciod digestive gland and]
