# Supplementary material for: Carbohydrates digestion and metabolism in the spiny lobster (Panulirus argus): biochemical indication for limited carbohydrate utilization
Source: PeerJ. 2017 Nov 3;5:e3975. doi: 10.7717/peerj.3975 (PMC5672836; doi:10.7717/peerj.3975)
Supplement: Supplemental Information 3 [file peerj-05-3975-s003.xlsx]

## Sheet: Time course
	Glucose jastric juice									Glucose hemolymph
	DIET	2h	6h	12h	24h	30h				DIET	2h	6h	12h	24h	30h
	6	0.347168	0.452726	0.168102	0.394023	0.293559				6	0.928007	0.412448	0.12889	0.234656	0.545772
	6	0.687299	0.860883	0.562092	0.676911	0.752894				6	1.12392	0.58516	0.136623	0.263658	0.490404
	6	0.398774	0.445689	0.157596	0.269417	0.176136				6	1.57473	0.375469	0.430492	0.490404	0.627506
	6	0.33544	0.846809	0.672409	0.400758	0.466241				6	0.96366	0.596365	0.394403	0.163468	0.788337
	6	0.462109	0.570013	0.743327	0.447907	0.321189				6	1.23742		0.278402	0.102827
	6	0.539518	0.595816		0.515261	0.124331				20	4.96484	0.931143	0.505248	0.474584	0.690784
	20	0.734214	1.14706	0.727567	0.609557	0.328096				20	5.82582	0.569693	0.335114	0.29266	0.598504
	20	0.760017	1.31361	0.803739	0.262682	0.348818				20	0.788806	0.497515	0.590316	0.735606	0.424489
	20	0.36828	0.513715	0.309938	0.252579	0.22794				20	0.458848	0.639294	0.817162	0.247838	0.912257
	20	0.591124	1.73115	0.950828	0.316566	0.221033				20	5.13497	0.534585	2.41024	0.759335	0.962352
	20	0.647422	0.870266	0.359844	0.313198	0.248662				20	0.685694	0.64593	0.958941	0.543576
	20	0.43396	0.380008	0.204875	0.313198	0.44552				35	5.09373	0.349865	0.672805	0.535226	0.374394
	35	0.635693	1.11422	1.52343	0.296359	0.231394				35	5.39275	0.319647	0.45627	0.572138	0.469311
	35	0.701374	1.43559	0.380857	0.252579	0.967019				35	5.40049	0.477265	0.77334	0.348029	0.487683
	35	0.806932	0.75298	2.05925	0.319933	0.148507				35	5.47844	0.29742	0.469159		0.388959
	35	0.375317	0.811623	0.50168	0.387288	0.321189				Fish	0.572271	0.229424	0.494937	0.413656	0.611686
	35	0.867921	1.24793	2.02248	0.326669	0.393715				Fish	0.422759	0.438226	0.884185	0.552271	0.371758
	35	0.452726	0.935947							Fish	1.02339	0.244891	0.406033	0.476536	0.150285
	Fish	0.408157	0.391737	0.165476	0.255947	0.238301				Fish	0.79872	0.389248	0.651235	0.546538	0.424489
	Fish	0.304945	0.813969	0.196995	0.528732	0.11397
	Fish	0.410503	0.999281	0.730194	0.498422	0.331549
	Fish	0.520752	0.40112	0.484951	0.346875	0.248662
	Fish	0.311982	0.760017	0.333404	0.127973	0.193404
	Fish	0.412849	1.84609	1.20564	0.19196	0.141599
	Protein gastric juice								Amylase gastric juice
	DIET	2h	6h	12h	24h	30h			DIET	2h	6h	12h	24h	30h
	6	17.7977	7.63731	6.12697	12.1756	16.3657			6	7.476	4.6452	5.6658	6.426	4.242
	6	1.84587	7.98758	15.2413	16.7272	13.342			6	7.0434	6.4239	5.7204	6.3441	5.5146
	6	14.4714	7.75564	7.31075	18.1663	17.7116			6	7.2996	5.65327	5.5566	4.7964	5.7622
	6	10.7377	8.36878	4.09043	5.03863	15.6939			6	7.8746	4.7289	5.43234	4.2924	4.4325
	6	5.29923			3.12385	14.6702			20	2.9505	3.8724	3.1731	2.3793	3.8241
	20	7.47385	9.987	11.5587	8.89079	16.7295			20	2.1147	1.7661	1.4259	4.3092	2.1987
	20	4.82051	16.034	7.33404	7.49673	12.7662			20	3.3789	4.6242	3.8976	2.2239	2.8728
	20	5.01855	10.3074	8.01135	15.4582	13.1843			20	4.1244	4.3877	3.5973	2.4171	3.3465
	20	2.22685	12.9756	9.38254	18.1098	20.0507			20	2.9653	3.5238	4.0488	3.3474	2.7844
	20	12.3322			12.6893	19.6383			20			3.969
	35	11.0136	15.8963	2.48862	18.8205	0.296678			35	4.0782	2.124	6.8859	5.2143	4.5549
	35	7.69301	14.5916	16.3434	17.2391	6.23696			35	6.3651	2.4824	4.6011	5.9661	3.8388
	35	8.6033	15.7838	14.109	6.75928	16.3707			35	3.8514	2.553	3.5931	2.7426	4.5778
	35	9.83576	13.8652	13.4958	10.8041	10.5875			35	3.3558	3.0746	3.4587	3.4944	4.2074
	Fish	17.035	24.3284	13.5571	16.3935	15.9832			Fish	3.7443	5.3739	2.7657	3.8944	2.4675
	Fish	15.5759	11.7377	9.42796	12.95	3.91949			Fish	6.9951	6.9174	5.8695	6.8859	2.8035
	Fish	9.73869	15.8753	10.6026	14.8654	4.5827			Fish	6.4722	7.4046	7.2786	5.3753	2.1231
	Fish	9.03878		11.4765	11.0485	5.36409			Fish	6.9594	5.2626	6.0018	4.9823	209384
									Fish		3.2949			3.76427

## Sheet: Amylase 24 h after ingestion
	Amylase gene expression
	6	20	35	fresh fish
	1.00386	0.78968	0.42095	1.38745
	1.08648	1.09541	0.8995	1.15767
	1.27976	0.86636	0.86393	1.02638
	1.05962	0.84582	0.73782	1.39684
	Amylase digestive gland
	6	20	35	fresh fish
	23.04	23.25	24.94	66.41
	42.44	38.04	33.95	69.65
	14.04	14.94	21.75	54.78
	33.24	27.49	27.43	58.63
	14.65	32.8	17.86
	Amylase gastric juice
	6	20	35	fresh fish
	6.426	2.3793	5.2143	3.8944
	6.3441	4.3092	5.9661	6.8859
	4.7964	3.6652	2.7426	5.3945
	4.2924	2.4171	3.4944	3.5843
	5.9579	3.3474		2.6435
